# Supplementary material for: Increased CYP2J3 Expression Reduces Insulin Resistance in Fructose-Treated Rats and db/db Mice
Source: PubMed Central journal article supplement — Diabetes. 2010 Jan 12;59(4):997–1005. doi: 10.2337/db09-1241 (PMC2844847; doi:10.2337/db09-1241), 2010-01-12
Supplement: supp_db09-1241_db09-1241_online_appendix.pdf [file supp_db09-1241_db09-1241_online_appendix.pdf]

**Supplementary information for Xu et al.**

**EXPANDED MATERIALS AND METHODS**

**Rat serum and urine analyses**

Just prior to gene delivery at week 3 of the study, approximately 1 ml of blood was drawn from the tail vein of each rat. After coagulation, serum was collected by centrifugation and stored at -80°C. Urine samples were collected over a 24-hour period prior to gene delivery, as described previously (19). Serum glucose was determined by the glucose oxidase/phosphohydrolase method, serum cholesterol by the cholesterol oxidase/phosphohydrolase method, and serum triglyceride by the glycerol phosphate oxidase/phosphohydrolase method as described elsewhere (19). Insulin resistance was calculated using the homeostasis model assessment (HOMA-IR) method. Serum insulin levels were measured with a magnetic solid phase enzyme immunoassay kit from BioChem Immunosystems (Rome, Italy). Two weeks after gene delivery (i.e. at week 5 of the study), serum and urine samples were collected and analyzed in a similar manner from 8 rats from each of the above groups. Serum sodium, serum potassium, serum magnesium, serum LDL-C, serum HDL-C, urine sodium, urine potassium and urine magnesium were measured on an AEROSSET Clinical Chemistry System (Abbott Laboratories, Chicago, IL). Urinary osmolarity was measured on a model 3D3 single-sample osmometer (Advanced Instruments, Inc, Norwood, MA).

**Figure S1.** CYP2J3 gene delivery attenuates changes in IRS phosphorylation and eNOS protein levels in liver and skeletal muscle of fructose-treated rats. IRS-1-Ser(P)307, IRS-1-Tyr(P)989 and  $\beta$ -actin (A, B) or eNOS and  $\beta$ -actin (C, D) levels were assessed by western blotting in liver (A, C) and skeletal muscle (B, D) lysates from 3 rats per treatment group at week 5 of the study. Representative western blots and corresponding densitometric quantification of three experiments are shown. Values shown are mean  $\pm$  SEM. \* $P$ <0.05 vs. N+pcDNA3.1; # $P$ <0.05 vs. F+pcDNA3.1; \*\* $P$ <0.05 vs. F+pcDNA-CYP2J3(+).

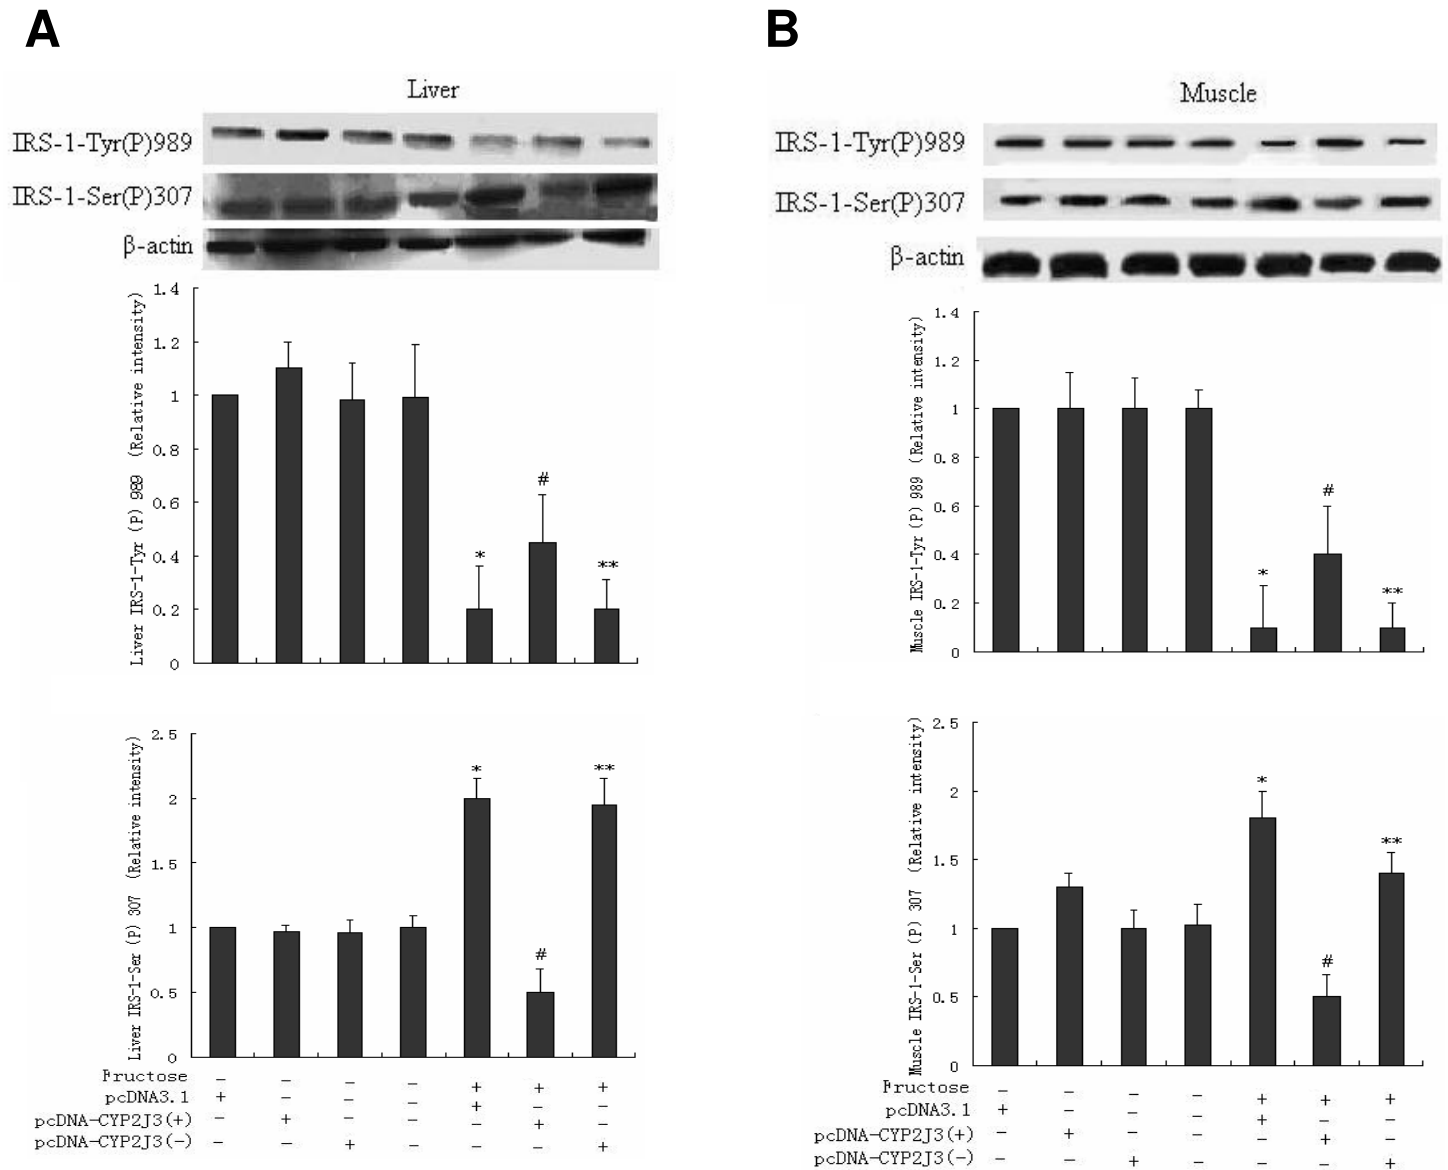

**C**

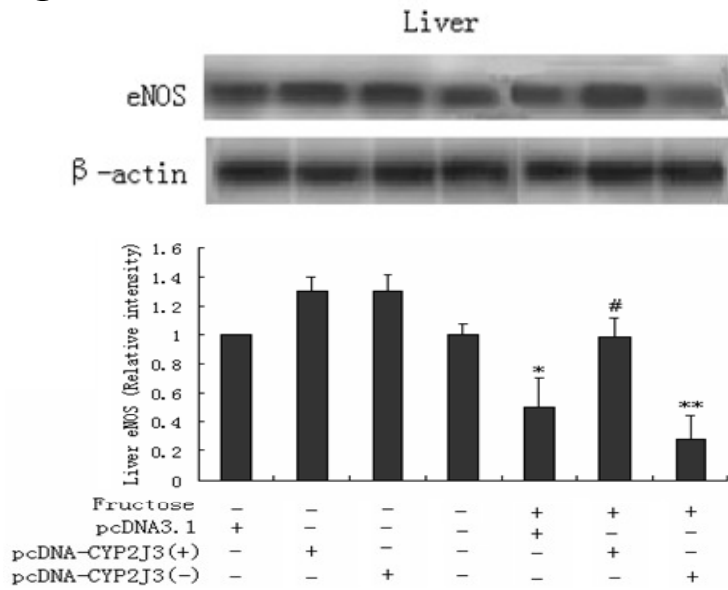

**D**

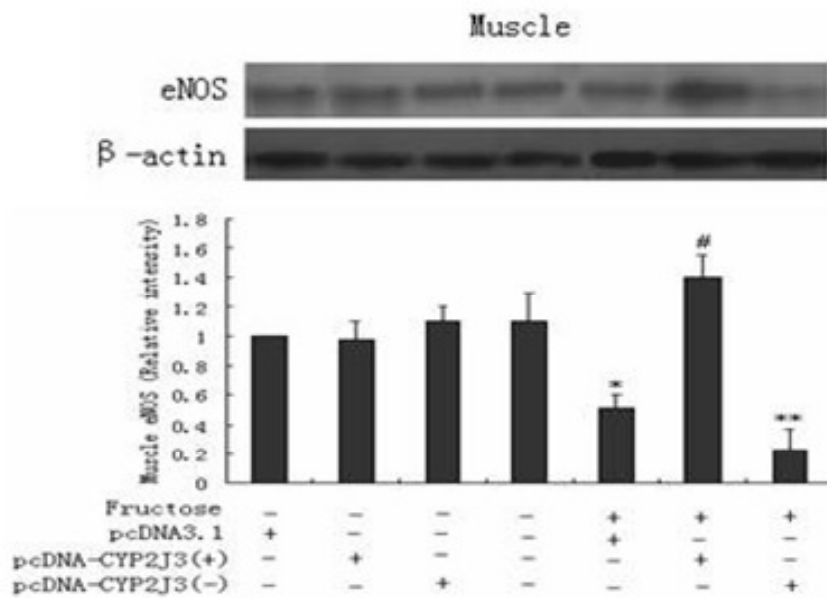

**Figure S2.** CYP2J3 gene delivery attenuates changes in IRS-1 and eNOS phosphorylation levels in skeletal muscle of db/db mice. IRS-1-Ser(P)307, IRS-1-Tyr(P)989 and IRS-1 (A) or, eNOS-Ser(P)1177, eNOS-Thr(P)495 and eNOS (B) levels were assessed by western blotting in skeletal muscle lysates from 3 mice per treatment group two weeks after gene delivery. Representative western blots and corresponding densitometric quantification are shown. Values shown are mean  $\pm$  SEM. \* $P$ <0.05 vs. pcDNA3.1; # $P$ <0.05 vs. db/db pcDNA3.1.

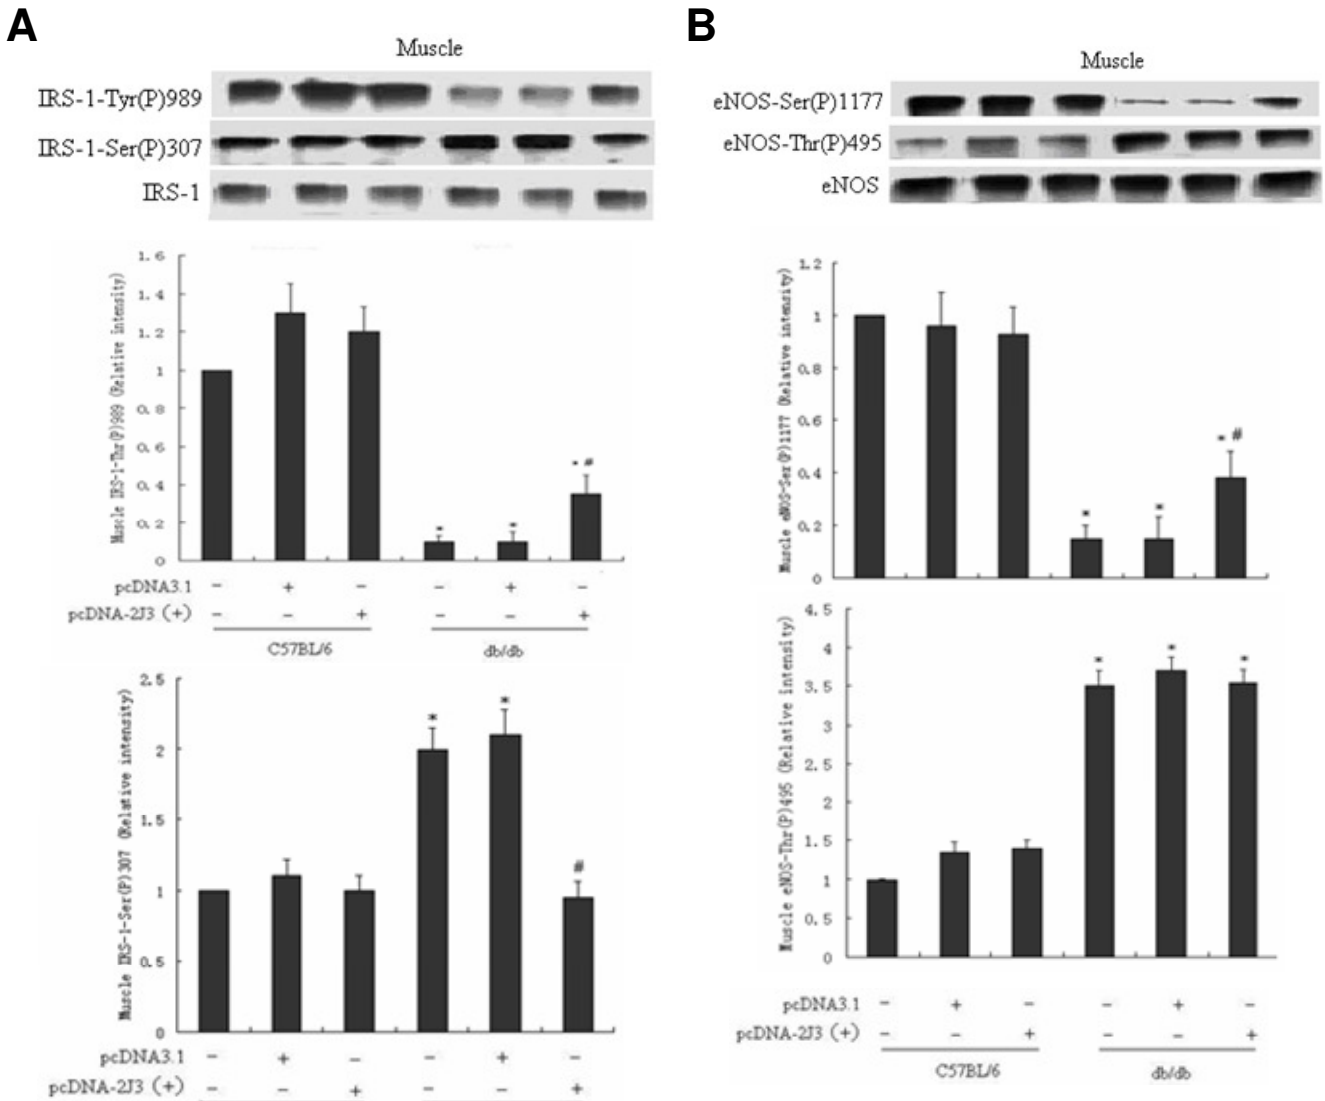

**Figure S3.** CYP2J3 gene delivery prevents the decrease in PI3K (P110) expression in skeletal muscles of fructose-treated rats or db/db mice. PI3K and  $\beta$ -actin levels were assessed by western blotting in skeletal muscle from 3 rats (A) or mice (B) per indicated treatment group two weeks after gene delivery. Representative western blots and densitometric quantification PI3K relative to  $\beta$ -actin protein levels are shown. Values shown are mean  $\pm$  SEM. \* $P$ <0.05 vs. N+pcDNA3.1 or C57BL/6; # $P$ <0.05 vs. F+pcDNA3.1 or db/db+pcDNA3.1; \*\* $P$ <0.05 vs. F+pcDNA-CYP2J3(+).

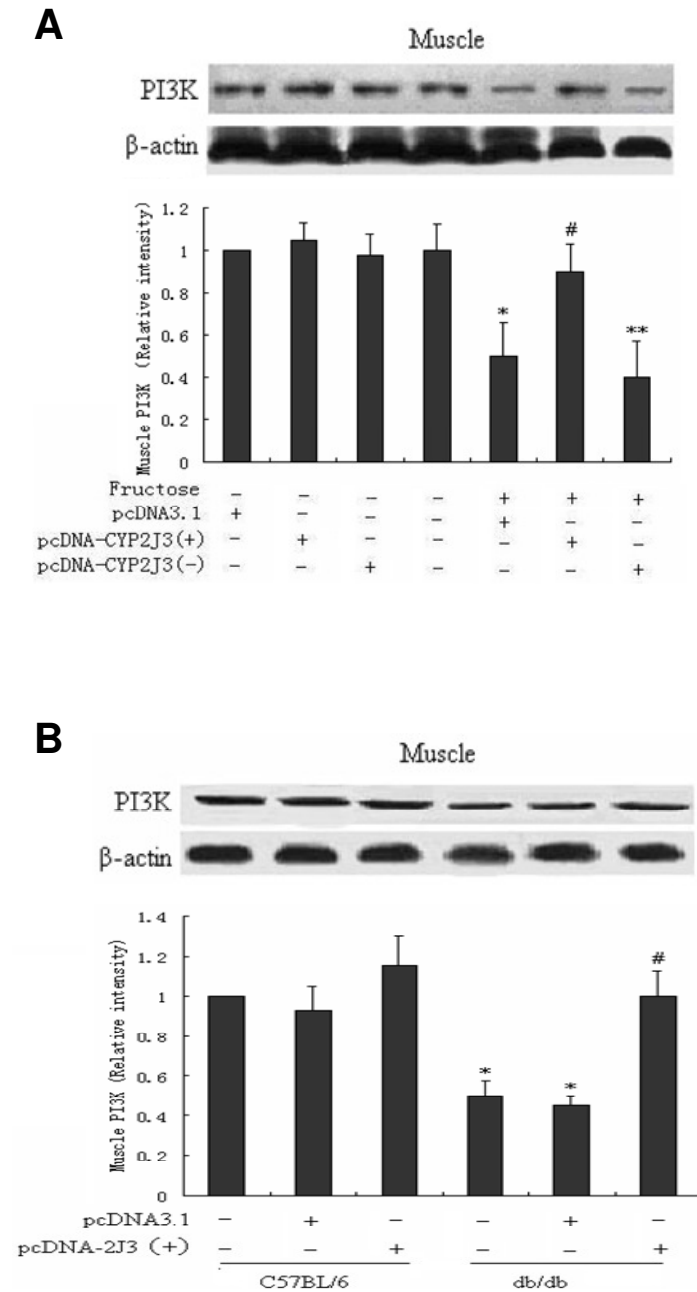

**Figure S4.** CYP2J3 gene delivery prevents the decrease in phospho-AKT (T308) detected in liver and skeletal muscles of fructose-treated rats or db/db mice. Phospho-AKT (P-AKT) and AKT levels were assessed by western blotting in liver (A, C) and skeletal muscle (B, D) from 3 rats (A, B) or mice (C, D) per indicated treatment group two weeks after gene delivery. Representative western blots and densitometric quantification of P-AKT relative to AKT protein level are shown. Values shown are mean  $\pm$  SEM. \* $P$ <0.05 vs. N+pcDNA3.1 or C57BL/6; # $P$ <0.05 vs. F+pcDNA3.1 or db/db+pcDNA3.1; \*\* $P$ <0.05 vs. F+pcDNA-CYP2J3(+).

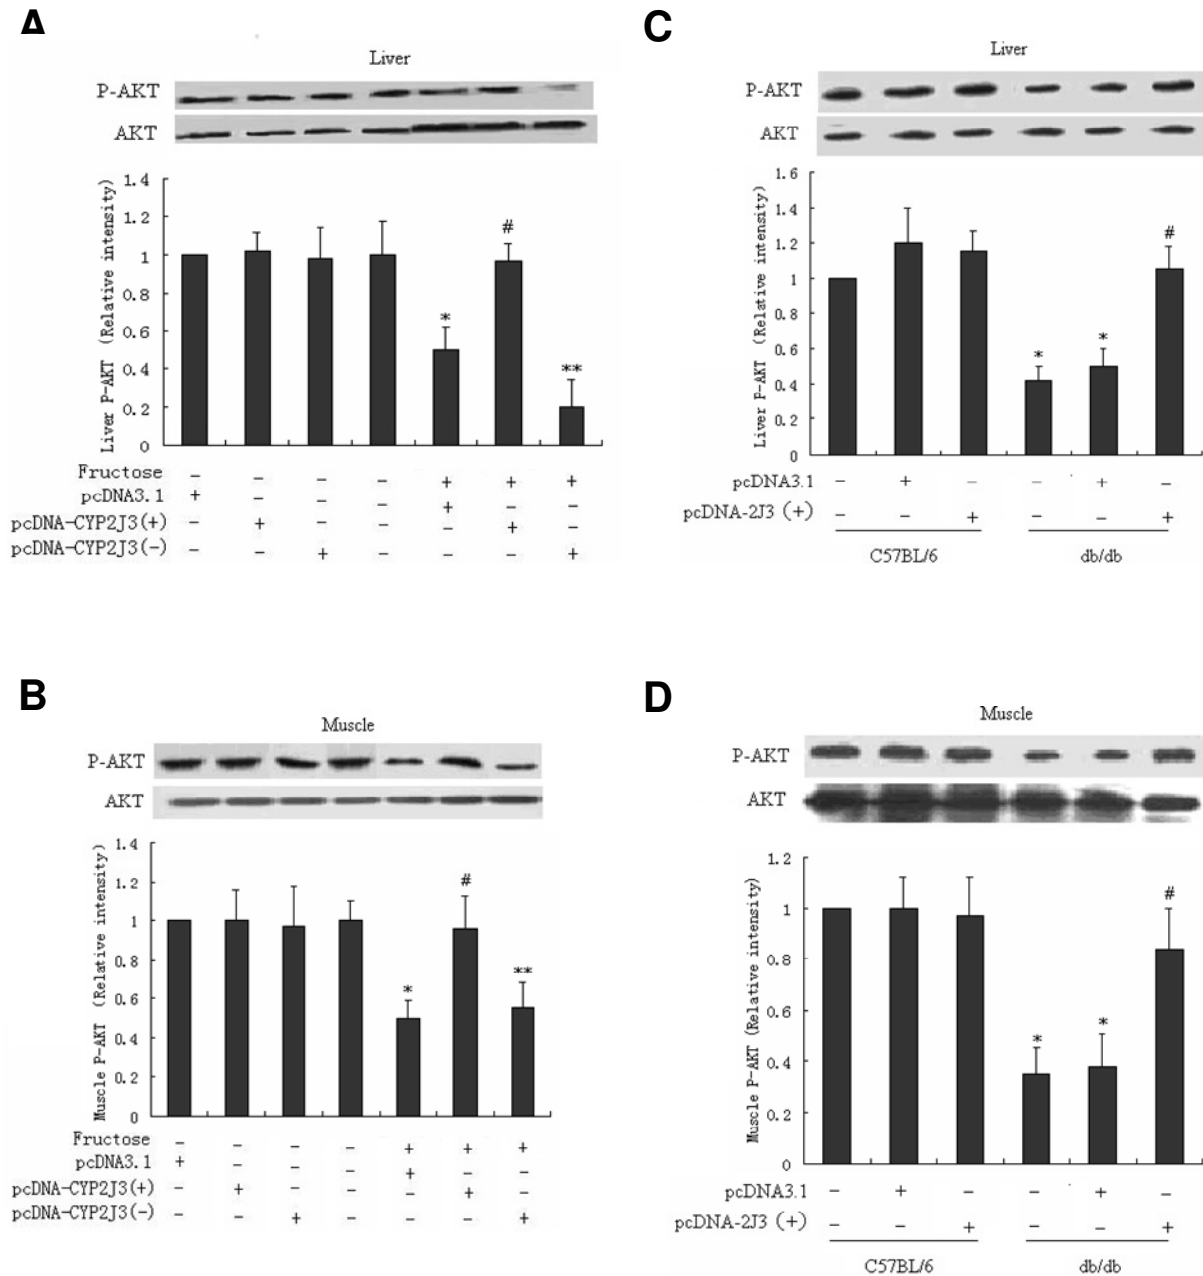

**Figure S5.** CYP2J3 gene delivery prevents the decrease in phospho-AMPK (T172) detected in liver and skeletal muscles of fructose-treated rats or db/db mice. Phospho-AMPK (P-AMPK) and AMPK levels were assessed by western blotting in liver (A, C) and skeletal muscle (B, D) from 3 rats (A, B) or mice (C, D) per indicated treatment group two weeks after gene delivery. Representative western blots and densitometric quantification P- AMPK relative to AMPK protein level are shown. Values shown are mean  $\pm$  SEM. \* $P$ <0.05 vs. N+pcDNA3.1 or C57BL/6; # $P$ <0.05 vs. F+pcDNA3.1 or db/db+pcDNA3.1; \*\* $P$ <0.05 vs. F+pcDNA-CYP2J3(+).

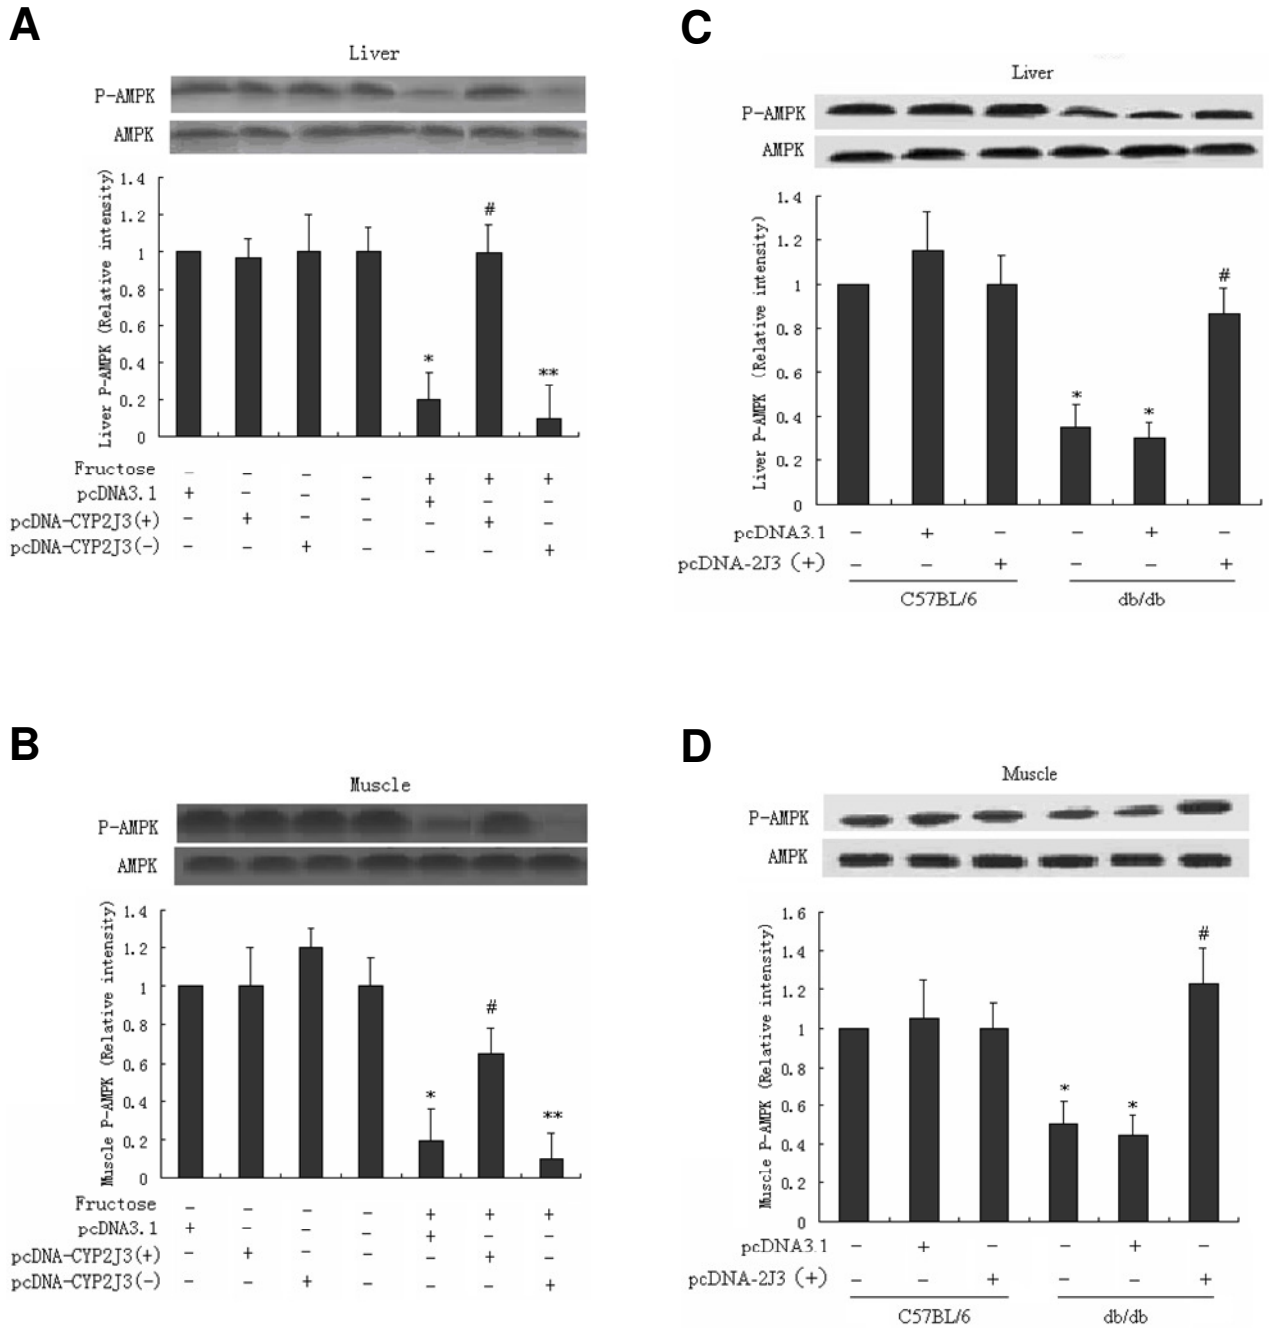

**Figure S6.** CYP2J3 gene delivery prevents the decrease in phospho-MAPK detected in liver and skeletal muscles of fructose-treated rats or db/db mice. Phospho-MAPK (P-MAPK) and MAPK levels were assessed by western blotting in liver (A, C) and skeletal muscle (B, D) from 3 rats (A, B) or mice (C, D) per indicated treatment group two weeks after gene delivery. Representative western blots and densitometric quantification P-MAPK relative to MAPK protein level are shown. Values shown are mean  $\pm$  SEM. \* $P$ <0.05 vs. N+pcDNA3.1 or C57BL/6; # $P$ <0.05 vs. F+pcDNA3.1 or db/db+pcDNA3.1; \*\* $P$ <0.05 vs. F+pcDNA-CYP2J3(+).

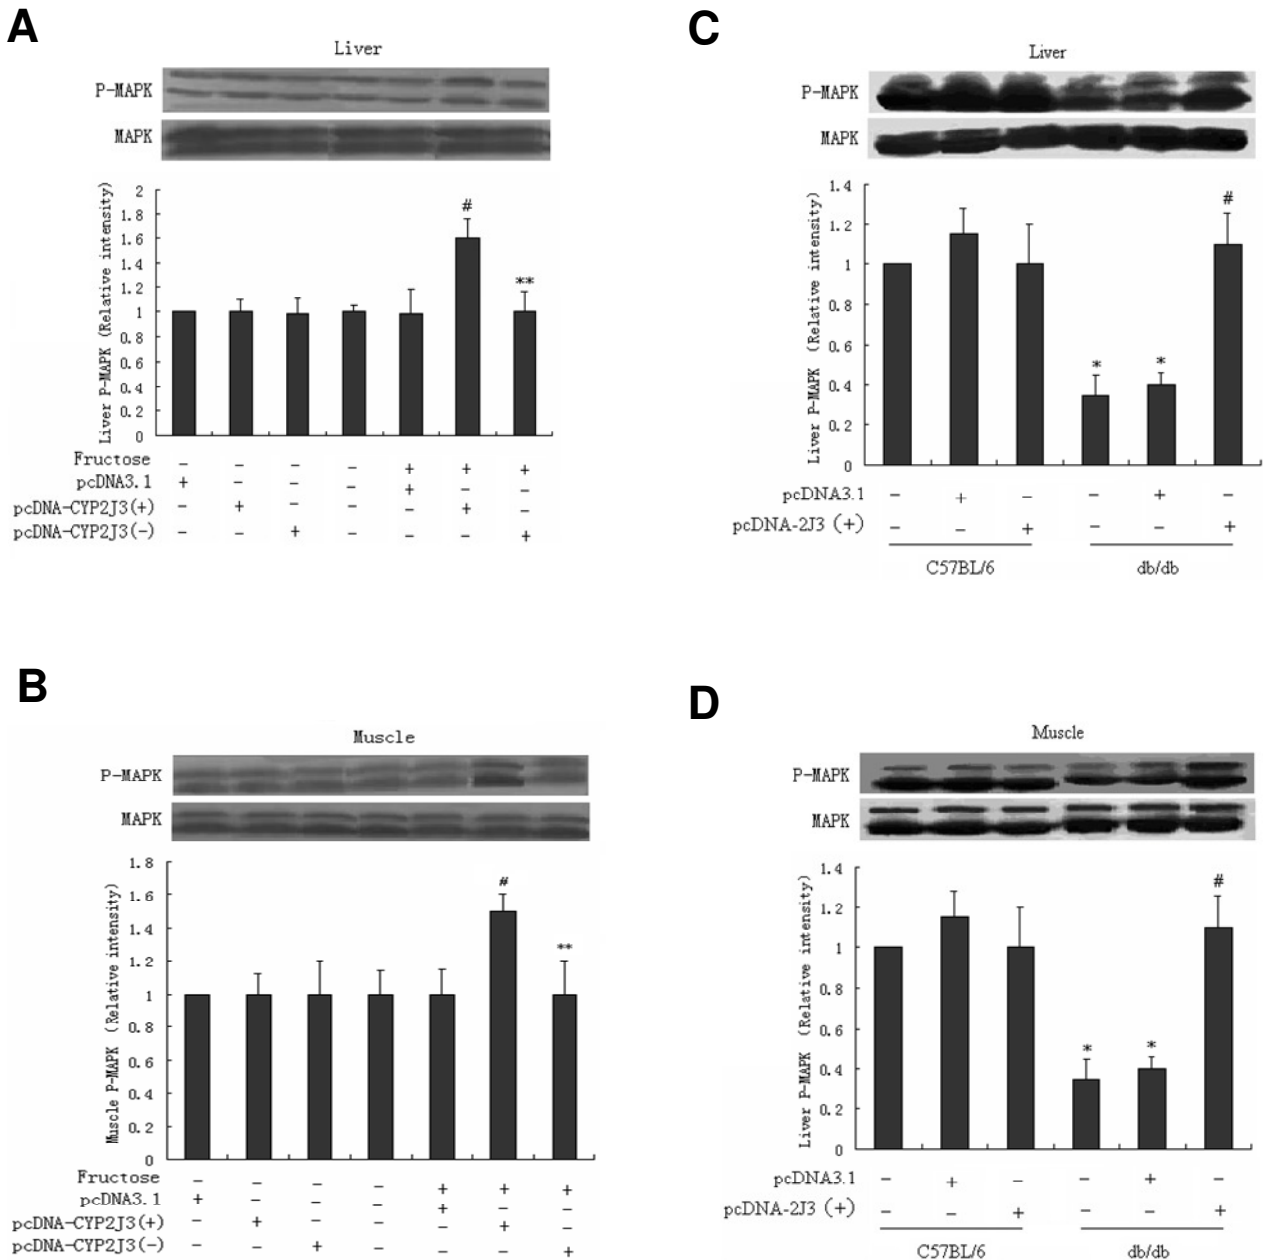



**Table S1.** Physiological parameters determined in rats after 3 weeks of administration of control or fructose-containing drinking water. Consumption of fructose-containing water resulted in significantly increased systolic blood pressure, increased levels of urine potassium, urine magnesium and urine volume, and significantly decreased urine osmolarity.

| Variable                                    | Control Group (n=32) | Fructose-treated Group (n=24) |
|---------------------------------------------|----------------------|-------------------------------|
| Systolic blood pressure (mm Hg)             | 111.7 ± 0.9          | 125.8 ± 0.4**                 |
| Cholesterol (mmol/L)                        | 1.52±0.22            | 1.07±0.31                     |
| HDL-C (mmo/L)                               | 0.77±0.1             | 0.51±0.12                     |
| LDL-C (mmo/L)                               | 0.15±0.05            | 0.14±0.06                     |
| Serum sodium (µmol/L)                       | 142.3 ± 1.6          | 136.1 ± 8.4                   |
| Serum potassium (µmol/L)                    | 4.73 ± 0.47          | 5.06 ± 0.9                    |
| Serum magnesium (µmol/L)                    | 0.81 ± 0.07          | 0.95 ± 0.1                    |
| Urine volume (mL/day/100g)                  | 5.8 ± 0.6            | 9.2 ± 0.1*                    |
| Urine osmolarity (mOsm/Kg H <sub>2</sub> O) | 1864 ± 449           | 469 ± 163**                   |
| Urine sodium (µmol/24 h)                    | 388.8 ± 21.1         | 320.7 ± 42.2                  |
| Urine potassium (µmol/24 h)                 | 13.35 ± 2.82         | 122.48 ± 73.78**              |
| Urine magnesium (µmol/24 h)                 | 0.11 ± 0.06          | 5.29 ± 0.72**                 |

\*P<0.05 vs. control group; \*\*P<0.01 vs. control group.

**Table S2.** Physiological parameters determined in rats 2 weeks following injection of empty pcDNA3.1 vector, pcDNA-2J3(+) or pcDNA-2J3(-). Compared to values in the normal water-treated groups, urine volume, urine potassium and urine magnesium levels were all higher, while urine osmolarity was lower in fructose-treated rats injected with the empty pcDNA vector (F+pcDNA group). All of these changes were prevented by injection of fructose-treated rats with CYP2J3(+), but not with CYP2J3(-).

| Variable                                    | Treatment Group      |               |               |            |                  |                         |               |
|---------------------------------------------|----------------------|---------------|---------------|------------|------------------|-------------------------|---------------|
|                                             | Normal Water-treated |               |               |            | Fructose-treated |                         |               |
|                                             | N+<br>pcDNA3.1       | N+<br>p2J3(+) | N+<br>p2J3(-) | Normal     | F+<br>pcDNA3.1   | F+<br>p2J3(+)           | N+<br>p2J3(-) |
| Cholesterol (mmol/L)                        | 1.58±0.32            | 1.48±0.22     | 1.81±0.38     | 1.56±0.42  | 1.21±0.27        | 0.97±0.18               | 1.07±0.11     |
| HDL-C (mmo/L)                               | 0.73±0.04            | 0.74±0.1      | 0.81±0.22     | 0.70±0.03  | 0.53±0.05        | 0.48±0.09               | 0.58±0.04     |
| LDL-C (mmo/L)                               | 0.19±0.06            | 0.17±0.05     | 0.19±0.01     | 0.18±0.03  | 0.17±0.07        | 0.11±0.03               | 0.15±0.03     |
| Serum sodium (µmol/L)                       | 140.7±1.5            | 141.2±0.65    | 141.4±2.0     | 137.7±2.5  | 141.8±3.3        | 139.5 ± 3.1             | 143.0±1.8     |
| Serum potassium (µmol/L)                    | 5.81±0.81            | 4.41±0.47     | 4.04±0.30     | 4.81±0.61  | 4.60±0.07        | 4.40 ± 0.48             | 4.56 ± 0.14   |
| Serum magnesium (µmol/L)                    | 1.12±0.40            | 0.81±0.13     | 0.81±0.12     | 1.02±0.3   | 1.03±0.22        | 1.06 ± 0.29             | 1.14 ± 0.43   |
| Urine volume (mL/day/100g)                  | 3.3±0.8              | 3.4±0.6       | 3.7±0.8       | 3.0±0.5    | 14.0±0.3*        | 3.0 ± 0.8 <sup>#</sup>  | 24.6 ± 0.6**  |
| Urine osmolarity (mOsm/Kg H <sub>2</sub> O) | 1727±160             | 2147±296      | 1812±332      | 1963±198   | 257±108*         | 1572 ± 86 <sup>#</sup>  | 136±7.0**     |
| Urine sodium (µmol/24 h)                    | 400±27               | 430.4±43.1    | 436.4±31.1    | 429.0±30.0 | 297±49           | 303±31                  | 341±65        |
| Urine potassium (µmol/24 h)                 | 14.09±1.42           | 17.78±1.82    | 13.74±2.24    | 15.09±2.0  | 59.95±14.63*     | 26.74±4.76 <sup>#</sup> | 60.68±31.07** |
| Urine magnesium (µmol/24 h)                 | 0.25±0.19            | 0.17±0.09     | 0.19±0.06     | 0.15±0.09  | 3.19±0.29*       | 0.09±0.05 <sup>#</sup>  | 2.86±0.14**   |

\*P<0.05 vs. N+pcDNA3.1 group; #P<0.05 vs. F+pcDNA3.1 group; \*\*P<0.05 vs. F+p2J3(+) group; n=8 per group.

**Table S3.** Physiological parameters of renal and liver function determined in rats 2 weeks following injection of empty pcDNA3.1 vector, pcDNA-2J3(+) or pcDNA-2J3(-). Compared to values in rats injected with empty pcDNA vector, serum alanine aminotransferase, urea and creatinine have no significant changes in rats injected with CYP2J3.

| Variable      | Treatment Group      |               |               |            |                  |               |               |
|---------------|----------------------|---------------|---------------|------------|------------------|---------------|---------------|
|               | Normal Water-treated |               |               |            | Fructose-treated |               |               |
|               | N+<br>pcDNA3.1       | N+<br>p2J3(+) | N+<br>p2J3(-) | Normal     | F+<br>pcDNA3.1   | F+<br>p2J3(+) | N+<br>p2J3(-) |
| ALT (U/L)     | 4.29±0.75            | 3.40±0.93     | 5.25±1.70     | 5.10±0.68  | 5.20±0.86        | 5.00±0.84     | 5.40±0.93     |
| UREA (mmol/L) | 8.66±0.29            | 8.39±0.66     | 7.53±0.33     | 7.83±0.60  | 7.91±0.47        | 7.99±0.46     | 7.69±0.42     |
| CR (μmol/L)   | 24.77±1.71           | 22.00±1.35    | 23.68±1.13    | 22.94±1.63 | 23.54±1.25       | 23.78±1.65    | 24.10±1.48    |

\*P<0.05 vs. N+pcDNA3.1 group; #P<0.05 vs. F+pcDNA3.1 group; \*\*P<0.05 vs. F+p2J3(+) group; n=8 per group.

**Table S4.** Physiological parameters determined in mice 2 weeks following injection of empty pcDNA3.1 vector or pcDNA-2J3(+). Serum cholesterol level, urine volume and water intake were significantly higher in diabetic phenotype of db/db mice (injected with the empty pcDNA vector), compared to those in C57BL/6 mice. Injection of CYP2J3(+) significantly reduced urine volume in db/db mice, whereas injection of the empty pcDNA vector did not.

| Variable                  | C57BL/6     | C57BL/6+<br>pcDNA3.1 | C57BL/6+<br>p2J3(+) | db/db      | db/db+<br>pcDNA3.1 | db/db+<br>p2J3(+) |
|---------------------------|-------------|----------------------|---------------------|------------|--------------------|-------------------|
| Cholesterol (mmol/L)      | 2.27±0.17   | 1.69±0.15            | 1.87±0.2            | 4.06±0.6*  | 3.76±0.32*         | 3.62±0.65         |
| HDL-C (mmo/L)             | 0.863±0.102 | 0.909±0.169          | 1.18±0.134          | 1.44±0.44  | 1.50±0.185         | 1.31±0.256        |
| LDL-C (mmo/L)             | 1.49±0.22   | 1.46±0.17            | 1.64±0.15           | 1.89±0.39  | 1.99±0.1           | 1.81±0.41         |
| Urine volume (mL/24h/10g) | 0.28±0.045  | 0.32±0.012           | 0.303±0.025         | 0.42±0.03* | 0.431±0.015*       | 0.287±0.05#       |
| Water intake (mL/24h/10g) | 0.249±0.03  | 0.267±0.02           | 0.278±0.02          | 0.51±0.01* | 0.497 ± 0.032*     | 0.469 ± 0.035     |

\*P<0.05 vs. C57BL/6 group; #P<0.05 vs. db/db+pcDNA3.1 group; n=8 per group.
